# Supplementary material for: MYH9 Facilitates Cell Invasion and Radioresistance in Head and Neck Cancer via Modulation of Cellular ROS Levels by Activating the MAPK-Nrf2-GCLC Pathway
Source: MDPI journal article supplement (doi:10.3390/cells11182855), 2022-09-13
Supplement: s1 [file s1]

**Table S1.** List of the primers used in the present study.

| Gene     | Primer Sequences (5' -> 3')                        |
|----------|----------------------------------------------------|
| MYH9     | F: GAGCAAATGGGCCTGCT<br>R: TGTTGTCGGGCATGGA        |
| GCLC     | F: AACTCAGACATTGGATGGAG<br>R: ACCTTTGACAGTGGAATGAG |
| GCLM     | F: AGGGAGTTTCCAGATGTCTT<br>R: AAGCAATGATCACAGAATCC |
| GPX2     | F: TCATTGCCAAGTCCTTCTAT<br>R: TGTTCAGGATCTCCTCATTC |
| GSS      | F: TCCATGTGATCCGACGAACA<br>R: CACCTTCTTAGTCCCAGCCA |
| MnSOD    | F: CAAAGGGGAGTTGCTGGAAG<br>R: AGCAGTGGAATAAGGCCTGT |
| Catalase | F: GAGCCTACGTCCTGAGTCTC<br>R: CCGGATGCCATAGTCAGGAT |

**Table S2.** List of the primary antibodies used in the present study.

| Antibody    | Catalog number (Company)                           |
|-------------|----------------------------------------------------|
| MYH9        | ab138498 (abcam, Cambridge, UK)                    |
| GCLC        | ab53179 (abcam, Cambridge, UK)                     |
| GCLM        | GTX114075 (GeneTex, Irvine, CA, USA)               |
| GPX2        | GTX100292 (GeneTex, Irvine, CA, USA)               |
| p-GSK3b     | #9336 (Cell Signaling Technology Danvers, MA, USA) |
| p-PDK1      | #3061 (Cell Signaling Technology Danvers, MA, USA) |
| p-Akt(S473) | #4060 (Cell Signaling Technology Danvers, MA, USA) |
| p-Akt(T308) | #9275 (Cell Signaling Technology Danvers, MA, USA) |
| Akt         | #9272 (Cell Signaling Technology Danvers, MA, USA) |
| p-Erk       | #4370 (Cell Signaling Technology Danvers, MA, USA) |
| p-p38       | #9215 (Cell Signaling Technology Danvers, MA, USA) |
| p-JNK       | #4668 (Cell Signaling Technology Danvers, MA, USA) |
| Erk         | #9102 (Cell Signaling Technology Danvers, MA, USA) |
| p38         | #9212 (Cell Signaling Technology Danvers, MA, USA) |
| JNK         | #9252 (Cell Signaling Technology Danvers, MA, USA) |
| GAPDH       | MAB374 (EMD Millipore, Billerica, MA, USA)         |

**Table S3.** Patient characteristics and clinical information of the TCGA-HNSC dataset.

| Characteristic                    | No. (%) of HNC patients |
|-----------------------------------|-------------------------|
| <b>AGE</b>                        | 38-85                   |
| Mean age±SD (years)               | 60.87±11.87             |
| <b>AGE SPECIFIC GROUP</b>         |                         |
| <40                               | 18 (3.5%)               |
| 40-59                             | 64 (12.3%)              |
| 50-59                             | 151 (29.0%)             |
| 60-69                             | 174 (33.5%)             |
| ≥70                               | 112 (21.5%)             |
| Not Available                     | 1 (0.2%)                |
| <b>GENDER</b>                     |                         |
| Male                              | 384 (73.8%)             |
| Female                            | 136 (26.2%)             |
| <b>RACE</b>                       |                         |
| White                             | 445 (85.6%)             |
| Black or African American         | 47 (9.0%)               |
| Asian                             | 11 (2.1%)               |
| American Indian or Alaska native  | 2 (0.4%)                |
| Not Available                     | 15 (2.9%)               |
| <b>HPV STATUS</b>                 |                         |
| Positive                          | 21 (4.0%)               |
| Negative                          | 65 (12.5%)              |
| Not Available                     | 434 (83.5%)             |
| <b>PRIMARY SITE</b>               |                         |
| Tongue                            | 156 (30.0%)             |
| Larynx & Oropharynx & Hypopharynx | 136 (26.2%)             |
| Oral Cavity                       | 73 (14.0%)              |
| Floor of mouth                    | 62 (11.9%)              |
| Others                            | 93 (17.9%)              |
| <b>CLINICAL STAGE</b>             |                         |
| Stage I                           | 20 (3.8%)               |
| Stage II                          | 98 (18.8%)              |
| Stage III                         | 106 (20.4%)             |
| Stage VIA/VIB/VIC                 | 282 (54.2%)             |

|               |                     |
|---------------|---------------------|
| Not Available | 14 (2.7%)           |
| <b>TOTAL</b>  | <b>520 (100.0%)</b> |
